# Supplementary material
Source: PubMed Central journal article supplement (PMC6218825)
Supplement: CJN.02190218SupplementaryData.pdf [file CJN.02190218SupplementaryData.pdf]

*Supplemental material is neither peer-reviewed nor thoroughly edited by CJASN. The authors alone are responsible for the accuracy and presentation of the material.*

**Supplemental Table S1: Code-algorithms Used to Identify Outcomes and Covariables**

| Descriptions                                                                              | ICD-9 or CPT Codes                                                                                                                                                                                                                                                                                                                                                                             |
|-------------------------------------------------------------------------------------------|------------------------------------------------------------------------------------------------------------------------------------------------------------------------------------------------------------------------------------------------------------------------------------------------------------------------------------------------------------------------------------------------|
| Fracture neck of femur                                                                    | 820.XX                                                                                                                                                                                                                                                                                                                                                                                         |
| Fracture of other and unspecified parts of femur                                          | 821.XX                                                                                                                                                                                                                                                                                                                                                                                         |
| Internal fixation (without reduction, closed reduction, open reduction)                   | 78.55,79.15,79.35                                                                                                                                                                                                                                                                                                                                                                              |
| Partial hip replacement                                                                   | 81.52                                                                                                                                                                                                                                                                                                                                                                                          |
| Total hip replacement                                                                     | 81.51                                                                                                                                                                                                                                                                                                                                                                                          |
| Reduction without internal fixation (closed, open); repair of hip not otherwise specified | 79.05,79.25,81.40                                                                                                                                                                                                                                                                                                                                                                              |
| Arrhythmia                                                                                | 426.0, 426.1, 426.12, 426.13, 426.54, 426.7, 426.8, 426.81, 426.82, 426.89, 427.0, 427.1, 427.2, 427.3, 427.31, 427.32, 427.4, 427.41, 427.42, 427.81, 427.90                                                                                                                                                                                                                                  |
| Cerebrovascular disease                                                                   | 430.0, 431.0, 432.0, 432.1, 432.9, 433, 433.0, 433.01, 433.11, 433.21, 433.31, 433.31, 433.81, 433.91, 434, 434.01, 434.11, 434.91, 435.0, 435.1, 435.2, 435.8, 435.9, 436.0, 437.0, 437.1, 437.4, 437.5, 437.6, 437.8, 437.9, 438, 438.0, 438.1, 438.10, 438.11, 438.12, 438.13, 438.14, 438.19, 438.2, 438.20, 438.21, 438.22, 438.3, 438.30, 438.31, 438.32, 438.4, 438.40, 438.41, 438.42, |

*Supplemental material is neither peer-reviewed nor thoroughly edited by CJASN. The authors alone are responsible for the accuracy and presentation of the material.*

|                          |                                                                                                                                                                                                                                                                                                                                                                                                                                                                                                                                                                                                                                                                                                                            |
|--------------------------|----------------------------------------------------------------------------------------------------------------------------------------------------------------------------------------------------------------------------------------------------------------------------------------------------------------------------------------------------------------------------------------------------------------------------------------------------------------------------------------------------------------------------------------------------------------------------------------------------------------------------------------------------------------------------------------------------------------------------|
|                          | 438.5, 438.50, 438.51, 438.52, 438.53, 438.6, 438.7, 438.8, 438.81, 438.82, 438.83, 438.84, 438.85, 438.89, 438.9                                                                                                                                                                                                                                                                                                                                                                                                                                                                                                                                                                                                          |
| Congestive Heart Failure | 398.91, 402.01, 402.11, 402.91, 404.01, 404.03, 404.11, 404.13, 404.91, 404.93, 425.1, 425.11, 425.18, 425.2, 425.4, 425.5, 425.7, 425.8, 425.9, 428.0, 428.1, 428.2, 428.21, 428.22, 428.23, 428.3, 428.31, 428.32, 428.33, 428.4, 428.41, 428.42, 428.43, 428.9                                                                                                                                                                                                                                                                                                                                                                                                                                                          |
| Coronary Artery Disease  | 410, 410.0, 410.01, 410.02, 410.1, 410.11, 410.12, 410.2, 410.21, 410.22, 410.3, 410.31, 410.32, 410.4, 410.41, 410.42, 410.5, 410.51, 410.52, 410.60, 410.61, 410.62, 410.70, 410.71, 410.72, 410.8, 410.81, 410.82, 410.9, 410.91, 410.92, 411.0, 411.1, 411.81, 411.89, 412.0, 413.0, 414.0, 414.00, 414.01, 414.02, 414.03, 414.04, 414.05, 414.06, 414.07, 414.2, 414.3, 414.4, 414.8, 414.9,                                                                                                                                                                                                                                                                                                                         |
| Depression               | 296.2, 296.21, 296.22, 296.23, 296.24, 296.25, 296.26, 296.30, 296.31, 296.32, 296.33, 296.34, 296.35, 296.36, 296.50, 296.51, 296.52, 296.53, 296.54, 296.55, 296.56, 296.82, 300.4, 311.0                                                                                                                                                                                                                                                                                                                                                                                                                                                                                                                                |
| Diabetes mellitus        | 249, 249.0, 249.00, 249.01, 249.1, 249.10, 249.11, 249.2, 249.20, 249.21, 249.3, 249.30, 249.31, 249.4, 249.40, 249.41, 249.5, 249.50, 249.51, 249.6, 249.60, 249.61, 249.7, 249.70, 249.71, 249.8, 249.80, 249.81, 249.9, 249.90, 249.91, 250, 250.0, 250.00, 250.01, 250.02, 250.03, 250.1, 250.10, 250.11, 250.12, 250.13, 250.2, 250.20, 250.21, 250.22, 250.23, 250.3, 250.30, 250.31, 250.32, 250.33, 250.4, 250.40, 250.41, 250.42, 250.43, 250.5, 250.50, 250.51, 250.52, 250.53, 250.6, 250.60, 250.61, 250.62, 250.63, 250.7, 250.70, 250.71, 250.72, 250.73, 250.8, 250.80, 250.81, 250.82, 250.83, 250.9, 250.90, 250.91, 250.92, 250.93, 357.2, 362.0, 362.01, 362.02, 362.03, 362.04, 362.05, 362.06, 362.07 |
| Hypertension             | 401.0, 401.1, 401.9, 402.0, 402.01, 402.10, 402.11, 402.9, 402.91, 403.0, 403.01, 403.1, 403.11,                                                                                                                                                                                                                                                                                                                                                                                                                                                                                                                                                                                                                           |

*Supplemental material is neither peer-reviewed nor thoroughly edited by CJASN. The authors alone are responsible for the accuracy and presentation of the material.*

|                             |                                                                                                                                                                                                                                                                                                                                               |
|-----------------------------|-----------------------------------------------------------------------------------------------------------------------------------------------------------------------------------------------------------------------------------------------------------------------------------------------------------------------------------------------|
|                             | 403.90, 403.91, 404.0, 404.01, 404.02, 404.03,<br>404.1, 404.11, 404.12, 404.13, 404.9, 404.91,<br>404.92, 404.93, 405.0, 405.01, 405.09, 405.11,<br>405.19, 405.9, 405.91, 405.99                                                                                                                                                            |
| Osteoporosis                | 733.0, 733.01, 733.02, 733.03, 733.09                                                                                                                                                                                                                                                                                                         |
| Peripheral Vascular Disease | 440.2, 440.21, 440.22, 440.23, 440.24, 440.29,<br>440.3, 440.31, 440.32, 440.4, 440.8, 440.9, 441.0,<br>441.01, 441.02, 441.03, 441.1, 441.2, 441.3, 441.4,<br>441.5, 441.6, 441.7, 441.9, 443.0, 443.1, 443.21,<br>443.22, 443.23, 443.24, 442.39, 443.81, 443.82,<br>443.9, 445.01, 445.02, 445.81, 445.89, 557.0,<br>557.1, 557.9          |
| Rheumatological disease     | 710, 710.0, 710.01, 710.02, 710.03, 710.04,<br>710.05, 710.06, 710.07, 710.08, 710.09, 710.1,<br>710.2, 710.3, 710.4, 710.5, 710.8, 710.9, 713.1,<br>713.3, 713.7, 714, 714.0, 714.1, 714.2, 714.3,<br>714.30, 714.31, 714.32, 714.33, 714.4, 714.8,<br>714.81, 714.89, 714.9, 720, 720.0, 720.1, 720.2,<br>720.8, 720.81, 720.89, 720.9, 725 |
| Tobacco Use                 | 305.10, 305.11, 305.12, 305.13                                                                                                                                                                                                                                                                                                                |

---

### Supplemental Figure 1: Subgroup Analysis

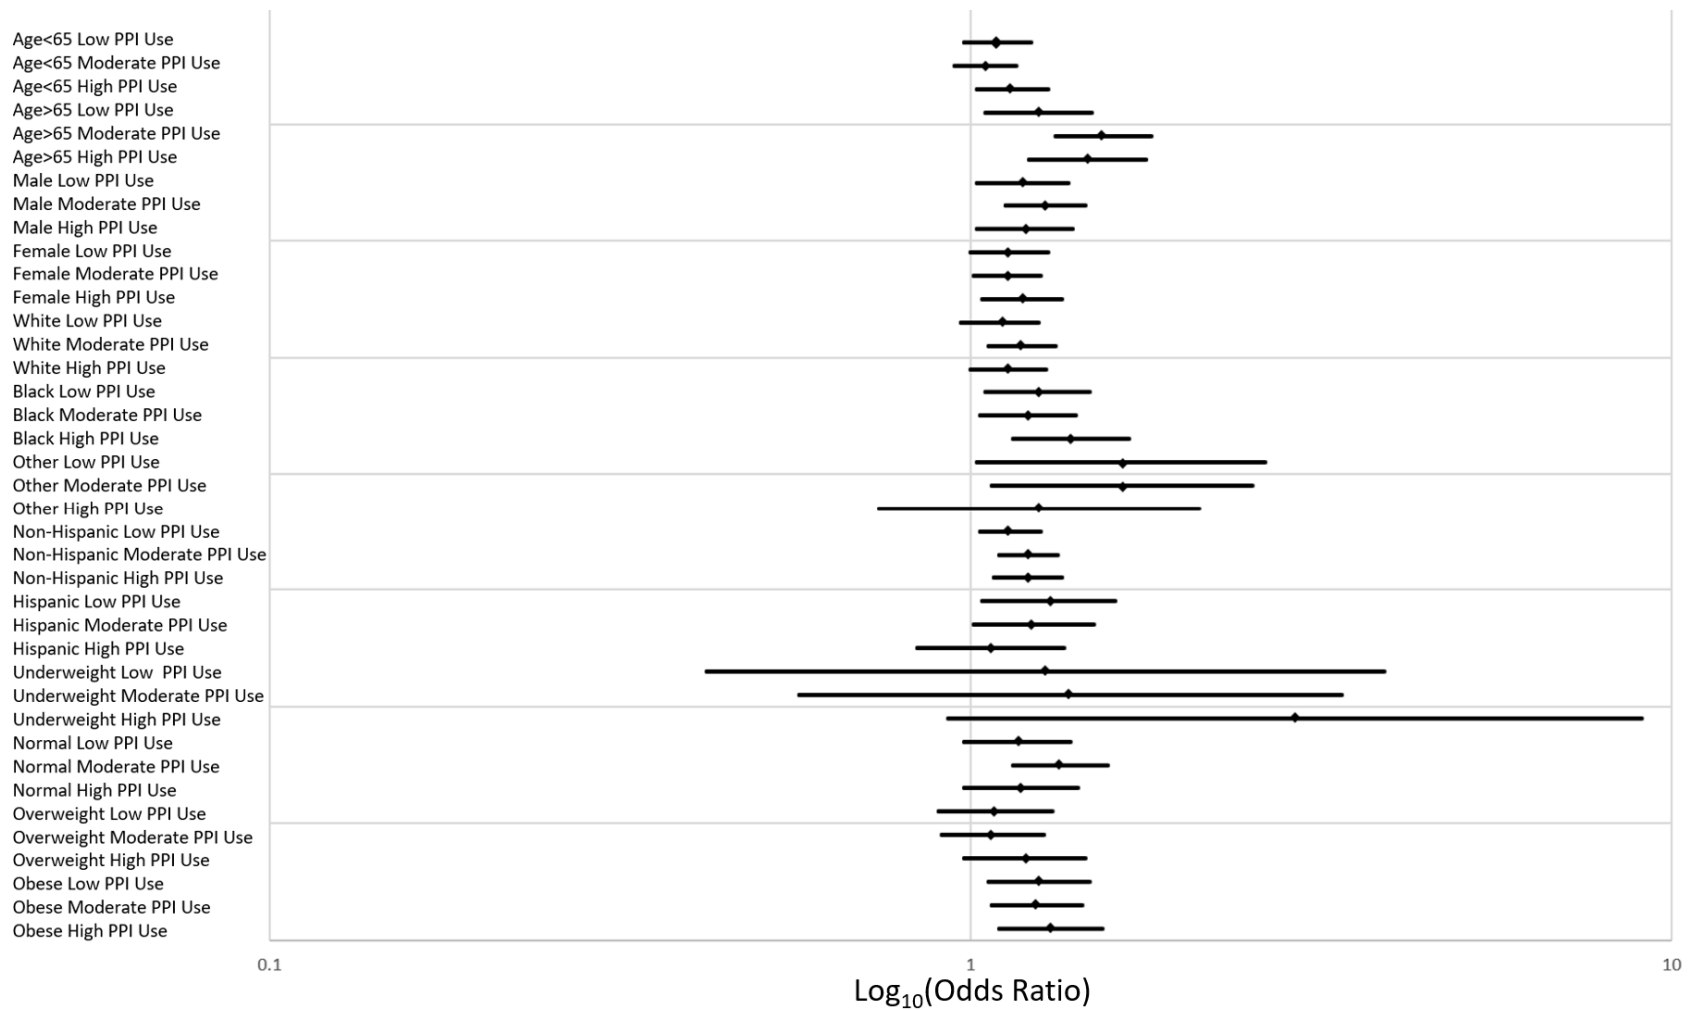

Note: PPI – Proton Pump Inhibitor
